# Supplementary material
Source: PubMed Central journal article supplement (PMC6759307)
Supplement: IAI.00483-19-s0001.pdf [file IAI.00483-19-s0001.pdf]

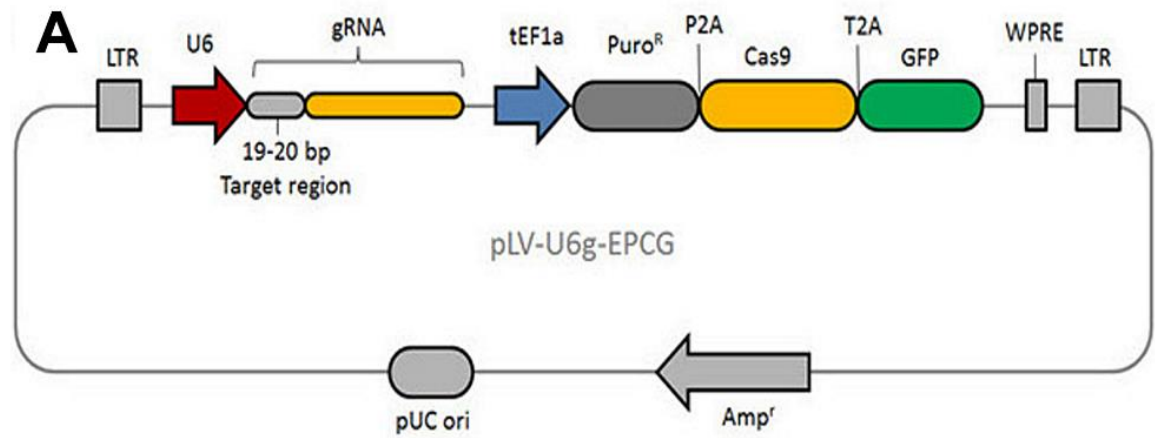

**B**

| Target ID    | gRNA sequence + PAM         | Species | Gene | Gene ID | RefSeq    | Exon |
|--------------|-----------------------------|---------|------|---------|-----------|------|
| HS0000274415 | CCACCTGAAGTT<br>GACTCAGGTA  | Human   | TLR3 | 7098    | NM_003265 | 2    |
| HS0000274416 | CCAACCTCACAA<br>GGTATAGCCA  | Human   | TLR3 | 7098    | NM_003265 | 2    |
| HS0000274440 | CAGGGTGTTTTTC<br>ACGCAATTGG | Human   | TLR3 | 7098    | NM_003265 | 4    |

1  
2  
3  
4  
5  
6

**FIG S1.** (A) Vector map of the all-in-one lentivirus CRISPR vector. (B) Selected TLR3-specific gRNA sequences incorporated into lentiviral particles for disruption of TLR3 gene expression.

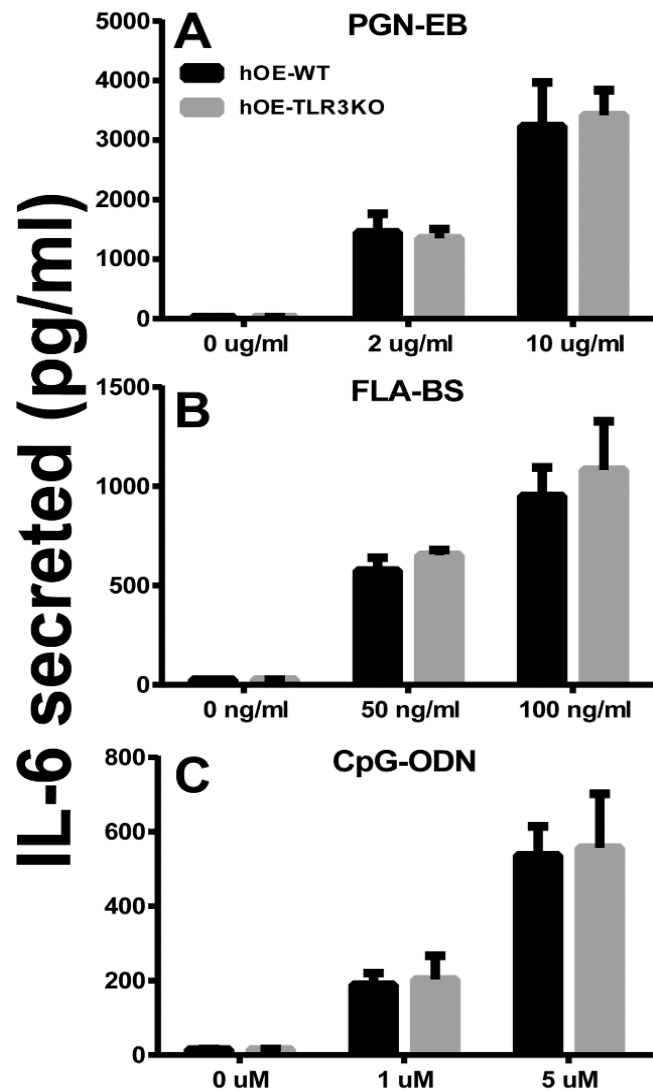

7

8

9

**FIG S2. ELISA from supernatants harvested at 24h post-infection from WT**

10

**vs. TLR3KD hOE cells treated with various TLR PAMPs.** ELISA was used to measure

11

the synthesis of IL-6 in WT and TLR3KD hOE cells 24hrs after the addition of (A) 0, 2 and

12

10µg/ml peptidoglycan purified from *E.coli* O111:B4 (**PGN-EB**); (B) 0, 50, and 100ng/ml

13

ultrapure flagellin isolated from the Gram-positive *B. subtilis* (**FLA-BS**); and 0, 1, and 5µM

14

of synthetic oligonucleotides containing unmethylated CpG dinucleotides (**CpG-ODN**).

15

Data are representative of three independent experiments.

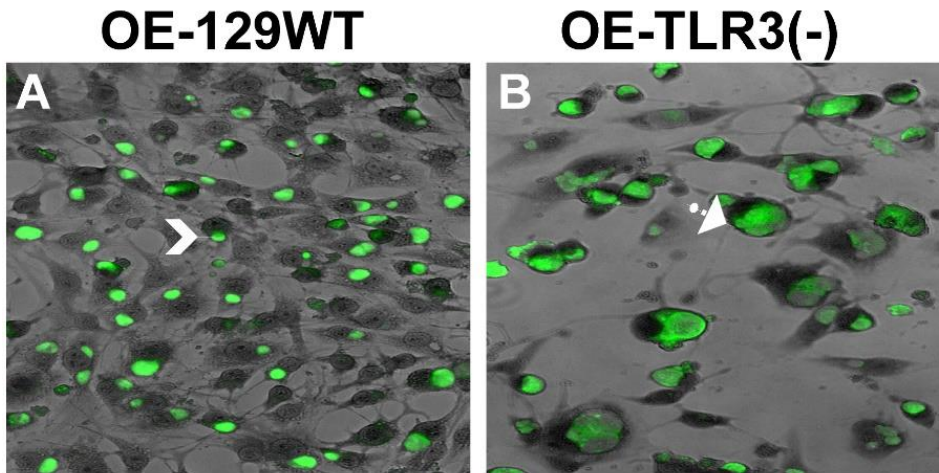

16

17 **FIG S3. TLR3 deficiency in murine OE cells leads to larger and aberrantly**  
18 **shaped chlamydial inclusions.** WT (A) and TLR3-deficient (B) mouse OE cells were  
19 infected with *C. muridarum* in triplicate at a MOI of 10 IFU/ cell for 24hrs. The chlamydial  
20 inclusion was stained using anti-chlamydial LPS monoclonal antibody and detected via  
21 Alexa-fluor 488 conjugated secondary antibody. *Data shown are representative. Arrows*  
22 *show smaller vs. larger inclusion; magnification 60x.*

23

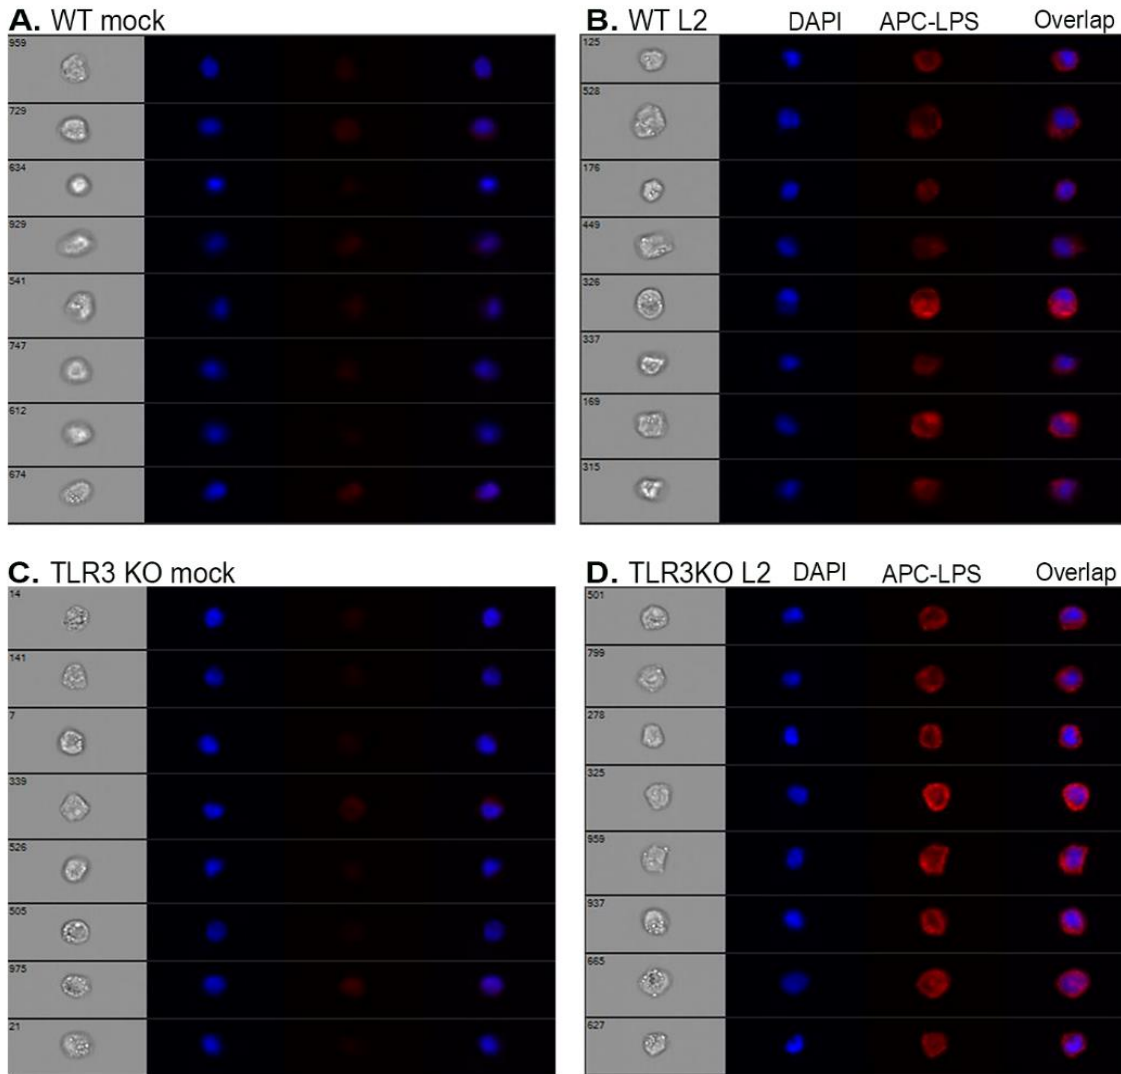

24

25

26

27

28

29

30

31

32

**FIG S4. Image Stream X analyses of the chlamydial inclusion in WT and TLR3-deficient hOE cells.** WT and TLR3-deficient (KD) hOE cells were either mock-treated or infected with *C. trachomatis* L2 in triplicate at a MOI of 10 IFU/ cell for 24hrs. The chlamydial LPS was stained using anti-*Chlamydia* LPS monoclonal antibody and detected via allophycocyanin (APC) conjugated secondary antibody, while APC-conjugated anti-IgG served as an isotype staining control. Individual cells were visualized and photographed using multi-spectral imaging flow cytometry. Nuclei were visualized via DAPI staining.

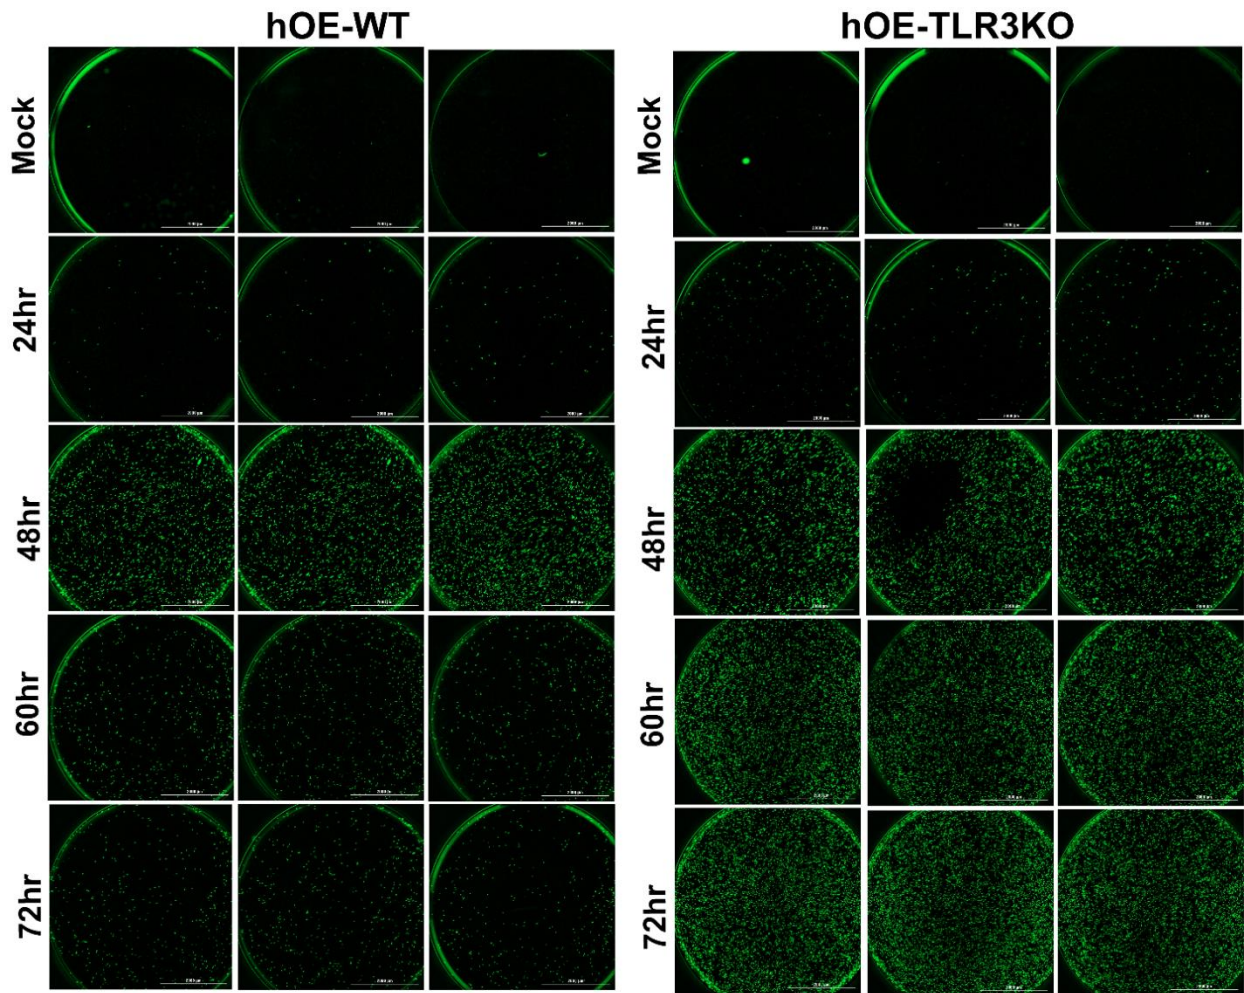

33

34

**FIG S5. TLR3 deficiency has an impact on chlamydial replication.** WT and

35

TLR3 deficient hOE cells were either mock treated or infected with *C. trachomatis*-serovar

36

D at MOI of 5 IFU/ cell for 72hrs. The infected cells were harvested at 24, 48, 60, and

37

72hrs post-infection, and the cell lysates were collected, sonicated, and titrated on fresh

38

Hela cell monolayers. Chlamydial inclusions were identified using anti-chlamydial LPS

39

monoclonal antibody and detected via Alexa-fluor 488 conjugated secondary antibody

40

after images were captured using the EVOS FL auto cell-imaging system. The data

41

presented are representative of three independent experiments.

42
